# Supplementary material
Source: PubMed Central journal article supplement (PMC6298077)
Supplement: pnas.1809544115.sapp.pdf [file pnas.1809544115.sapp.pdf]

1

## 2 **Supplementary Information for** 3 **Cats use hollow papillae to wick saliva into fur**

4 **Alexis C. Noel and David L. Hu**

5 **David L. Hu**

6 **E-mail: hu@me.gatech.edu**

### 7 **This PDF file includes:**

- 8     Supplementary text
- 9     Figs. S1 to S4
- 10    Tables S1 to S4
- 11    Captions for Movies S1 to S4
- 12    References for SI reference citations

### 13 **Other supplementary materials for this manuscript include the following:**

- 14     Movies S1 to S4

## 15 Supporting Information Text

### 16 Experimental methods

17 **High speed videography, kinematics, and forces during grooming.** Using high-speed camera equipment, a Phantom Miro M110  
18 at 500 frames per second, we filmed an adult short-haired domestic cat at the Georgia Institute of Technology. To observe  
19 grooming kinematics of the domestic cat, we wiped a wet washcloth on the back of the cat to entice it to groom. The fur was  
20 lit with LED lighting. The ensuing videos were tracked by hand using Tracker software to determine tongue kinematics.

21 Nylon fur (Mongolian 60 inch faux ivory fur with hair length of 8 cm) was procured from thefabricexchange.com, and  
22 secured to a force plate (AMTI HE6x6). The fur was sprayed with a pheromone-based calming fluid (Feliway) to entice the  
23 cats to lick the fur. Filming by a video camera (high-definition Sony HDR-HC9) served to synchronize grooming motions to  
24 force measurements. We measured the force applied by the tongue to the force plate, and found that the cat pressed down  
25 with  $0.13 \pm 0.13$  N of force (average for 29 lick measurements from a single cat). A sample of grooming forces normal ( $F_z$ ) and  
26 parallel ( $F_x$ ) to the plate during a grooming trial is shown in Figure S1.

27 **Tongue and papilla  $\mu$ CT visualization.** Cat tongues were procured from the following sources: six domestic cat tongues from  
28 the Applied Physiology department at Georgia Tech; one tiger tongue from Zoo Atlanta; three bobcat tongues and one cougar  
29 tongue from Carter Taxidermy; three tiger tongues, one snow leopard tongue, and one lion tongue from the Department of  
30 Small Animal Clinical Services at University of Tennessee and Tiger Haven. We first measured tongue dimensions by hand  
31 and report these values in Table S2. The lengths  $L_T$  and widths  $W_T$  of the cava papillae region have scalings of  $L_T \sim M^{0.42}$ ,  
32  $W_T \sim M^{0.42}$ , where  $M$  is body mass. Thus the grooming region scales nearly as expected based on isometry, the assumption  
33 that the tongue’s proportion does not change with body size.

34 We first used a Scanco  $\mu$ CT50 x-ray micro-computed tomography machine to scan an entire domestic cat tongue. A cat  
35 tongue was collected post-mortem, severed at the attachment with the throat. We placed the tongue in a 30-mm diameter  
36 tube, and scanned at a voltage of 45 kVp and current of 200  $\mu$ A.

37 To visualize the papillae, we removed the largest grooming papilla from each cat tongue using a scalpel and tweezers from  
38 the region shown in Figure 2D. During this process, the tongue was still frozen. We removed tissue remnants from the base  
39 cavity of the papilla using tweezers, and rinsed the papilla in water. Care was taken to avoid compressing the papillae with the  
40 tweezers. Each cat papilla was placed into a 3 mm diameter tube and scanned at highest resolution with 45 kVp and 200  $\mu$ A.  
41 We measured the cavity width, height, and volume from the scan using Blender software, and tabulate the data in Table S3.

42 **Measuring cat fur properties.** We measured the dimensions of fur for 6 cat species (cheetah *Acinonyx jubatus*, caracal *Caracal*  
43 *caracal*, Caucasian wildcat *Felis sylvestris caucasica*, leopard *Panthera pardus*, snow leopard *Panthera uncia*, and tiger *Panthera*  
44 *tigris*) at the Museum of Comparative Zoology at Harvard University. We further measured fur samples of 3 other species  
45 (bobcat *Lynx rufus*, cougar *Puma concolor*, and Eurasian lynx *Lynx lynx*) from furs procured from Promise Land Tannery.  
46 Using a portable Andonstar A1 USB microscope, we measured diameter and length of down hairs. Additional fur density and  
47 length values were gathered from literature (1–3). Fur density values from literature included both down and guard hairs - in  
48 our model, we assume this density value as an approximation for down hair density. While fur density and length may vary  
49 across the cat body, we only compare values measured at the midpoint of the cat back to remain consistent with literature.  
50 Hair and fur properties with associated references are tabulated in Table S4.

51 **Measurement of fluid transferred from cat grooming.** We designed and constructed a “grooming machine” that is able to pull  
52 a tongue across a sample of fur (Figure S2). An encoded motor (12V 25D mm gearmotor from Pololu.com), controlled by  
53 an Arduino microcontroller, drives a rack-and-pinion horizontally. The machine is able to vary pulling speeds. The tongue  
54 is secured to the end of the rack-and-pinion. To measure grooming forces, we used an AMTI HE6x6 force plate, with 2.2 N  
55 capacity in the X and Y direction, and 4.4 N capacity in the Z direction (into the plate).

56 We determined the amount of fluid transferred during a single grooming lick by weighing a wetted tongue before and after  
57 a groom. Before the experiment, we dried the tongue using paper towels and a hair dryer, and weighed the tongue using a  
58 Mettler Toledo analytical balance. The tongue’s carrying capacity for water was found by dipping a dry tongue in water,  
59 letting the excess fluid drip off, then weighing the wetted tongue. We repeated this process for only the dorsal and posterior  
60 side of the tongue. The dorsal side of the tongue, used in grooming, can hold 0.12  $\mu$ L of water total, 1.3 times more than the  
61 smooth back of the tongue. The fluid in the papillae cavities accounts for 5% of total fluid on the top of the tongue.

62 To simulate a grooming lick, we secured the severed cat tongue to the end of the rack-and-pinion of the grooming machine.  
63 We procured a sample of the same cat’s fur, of length  $L_{\text{groom}}$ . This fur was secured to the AMTI HE6x6 force plate. During a  
64 trial, the tongue was pulled through the fur sample at speed  $v_{\text{groom}}$ . The spacing between tongue and fur was adjusted so that  
65 the tongue applies a constant normal force of 0.1 N, approximating the measured grooming forces.

66 In Figure 4E, we report the volumes of water transferred after subtracting the artifacts due to evaporation, as shown in  
67 Figure S3 of the Supplement. To measure the rate of water evaporation from the cat tongue surface, we first dried a severed cat  
68 tongue using towels and a hair dryer, then measure the tissue mass using a Mettler Toledo analytical balance. Next, we dipped  
69 a severed tongue in water, allow it to drip, and then weighed the wetted tissue over a period of 80 seconds. The difference in  
70 wet and dry tissue mass provides the evaporative water loss over time. We find that approximately  $V_e = 6$  microliters of water  
71 evaporates from the tongue surface over a 30 second period, the length of a single trial. For visualization, we repeated the  
72 above experiment using cat’s tongue, dyed with food coloring, and nylon fur, shown in Figure 4C-D.

73 **Grooming forces with the TIGR Brush.** Using the TIGR Brush with the grooming machine, we measured grooming forces with  
 74 a faux fur sample. The faux nylon fur, Mongolian 60 inch faux fur ivory with hair length of 8 cm, is the same material from  
 75 the grooming force measurements. To simulate tangled fur, we blew air over the sample using a hair dryer for 30 seconds; the  
 76 long lengths of the fur naturally caused it to tangle when blown. We pulled the TIGR Brush through the fur 7 times and  
 77 measured the force along the grooming direction; between each trial, the mimic was reset and the fur was left untouched. We  
 78 repeated the experiment with a human hairbrush for comparison [Figure 5B]. The hairbrush, a Conair cushion brush with  
 79 plastic bristles, was altered for testing: the flexible base with bristles was detached from the brush handle, secured to a 3D  
 80 printed mount using epoxy, and the bristles were tripped to a height of 9 mm, the same height as the papillae mimic. The  
 81 TIGR Brush and Conair hairbrush were attached to the rack-and-pinion identically. For both brushes, the spacing between fur  
 82 and brush was set to that compressive force into the fur was 0.1 N, identical to a real grooming scenario.

## 83 Materials characterization methods

84 **Young's modulus of tissue and papilla.** We measured the softness of the domestic cat tongue using micro-indentation. A  
 85 domestic cat tongue was collected from Georgia Institute of Technology and tested within 10 hours of death. The tongue was  
 86 severed at the base connection to the throat. We used a TA Instruments ElectroForce 3100 to perform probe indentation tests  
 87 on the cat tongue. We used a rigid, flat-ended cylindrical indenter of diameter 2 mm to probe the soft tissue on the underside  
 88 of the tongue, where there are no papillae. Within the linear elastic solid regime, the Young's modulus is determined using:

$$89 \quad F = \frac{2E_{\text{tongue}}r\delta}{1 - \nu^2} \quad [1]$$

90 where  $E_{\text{tongue}}$  is the tongue's Young's modulus,  $r$  is the indenter radius,  $\delta$  is displacement, and  $\nu$  is the Poisson's ratio.  
 91 Poisson's ratio is assumed to be 0.5 for a perfectly elastic material (4). The Young's modulus was calculated from the force  
 92 and displacement measured from the indenter. The average Young's modulus of the cat tongue is  $9.1 \pm 3.7$  kPa ( $N = 5$  trials  
 93 from a single cat tongue). The softness value correlates well to the Young's modulus of muscle at 7 kPa (5). Next, we removed  
 94 a single papillae from the cat tongue tissue and the tested Young's modulus in a nanoindenter (Hysitron TriboIndenter). The  
 95 Young's modulus of the papillae is 1.66 - 1.94 GPa  $\pm$  3%, similar to human fingernails (6). The error from the nanoindenter  
 96 originates from the control measurements of polycarbonate samples immediately before and after the papillae testing, providing  
 97 correct modulus values within  $\pm$  3%.

## 98 Math methods

99 **Fluid wicking in the papillae.** We used three cat papillae (from one domestic cat and two tigers) to demonstrate the high rate  
 100 of wicking. Using the same camera and lighting in the cat grooming experiments, we filmed the motion of the fluid front in the  
 101 papillae. In Figure 2F, the solid squares show wicking into a domestic cat papilla, with a power law of  $z \sim t^{0.65}$  ( $R^2=0.97$ ),  
 102 where  $t$  is time. Solid and open triangles show wicking into two separate tiger papilla with power laws of  $z \sim t^{0.56}$  ( $R^2=0.98$ )  
 103 and  $z \sim t^{0.57}$  ( $R^2=0.97$ ) respectively.

104 The exponents for these trends is close to 1/2, consistent with Washburn's Law for capillary flow in a half-pipe of radius  $r$   
 105 (identical to a capillary tube), where flow is resisted by viscous forces. Washburn's Law (7) states that the position of the fluid  
 106 front  $z = \left(\frac{\sigma r \cos(\theta_p)}{2\mu}\right)^{1/2} t^{1/2}$ , where  $\theta_p$  is the fluid contact angle, and  $\mu$  is the fluid viscosity. Using the contact angle  $\theta_p$  as a free  
 107 parameter in Washburn's Law yields the red line in Figure 2F, which fits the data well. Moreover, we predict that the contact  
 108 angle of water on the three papillae is  $89.9^\circ \pm 0.15^\circ$  ( $N=3$ ). This contact angle suggests that papillae are mildly hydrophilic.  
 109 Indeed, Supp. video S3 shows a precursor film spreading ahead of the fluid front, which makes the cavity hydrophilic.

110 Water wicked into a papilla remains stable. This observation is consistent with the value of the Bond number (8),  
 111 which describes the magnitude of the gravitational forces compared to surface tension. The Bond number may be written  
 112  $Bo = \frac{\rho g w_{\text{cavity}}^2}{\sigma} = 0.012 \ll 1$ , where  $w_{\text{cavity}}$  is the papilla cavity width,  $g$  is gravitational acceleration, and  $\rho$  is the density of  
 113 water and  $\sigma$  is the surface tension of water. Since the Bond number is small, the fluid in the papilla remains stable due to  
 114 the forces of surface tension.

115 **Mathematical model for fur height.** The porosity of fur, or the fraction of air in a given volume of fur, is given by

$$116 \quad \epsilon = \frac{V_{\text{air}}}{V_{\text{total}}} = \frac{V_{\text{total}} - V_{\text{hairs}}}{V_{\text{total}}}, \quad [2]$$

117 where  $V_{\text{air}}$  and  $V_{\text{hairs}}$  are the volumes of air and hair in a given volume  $V_{\text{total}}$ . We simplify 2 by considering a rectangular  
 118 prism of fur, with fur height  $h_{\text{fur}}$ , and width and length of the tongue  $W_{\text{T}}$ , and  $L_{\text{T}}$  as shown in the red dotted box in Figure  
 119 3A. The air volume  $V_{\text{air}}$  can be written as the total volume  $V_{\text{total}}$  minus the volume  $V_{\text{hairs}}$  of all hairs in this region. Each  
 120 down hair is cylindrical with a radius  $r_{\text{hair}}$  and length  $L_{\text{hair}}$ . The total hair volume is the product of the volume of each hair  
 121  $\pi r_{\text{hair}}^2 L_{\text{hair}}$ , and the number of hairs, which can be written as the hair density per unit area,  $\rho_{\text{fur}}$ , multiplied by the area  $W_{\text{T}}L_{\text{T}}$ .  
 122 Thus, 2 simplifies to:

$$123 \quad \epsilon = \frac{h_{\text{fur}}W_{\text{T}}L_{\text{T}} - \rho_{\text{fur}}W_{\text{T}}L_{\text{T}}\pi r_{\text{hair}}^2 L_{\text{hair}}}{h_{\text{fur}}W_{\text{T}}L_{\text{T}}}. \quad [3]$$

124 Simplifying and rearranging 3 enables us to write the fur depth  $h_{\text{fur}}$ , defined as the distance between the skin and tongue, as:

$$125 \quad h_{\text{fur}} = \frac{\rho_{\text{fur}} \pi r_{\text{hair}}^2 L_{\text{hair}}}{1 - \epsilon}. \quad [4]$$

126 4 states that the more the hair is compressed, the lower the porosity. We can take 4 to its very limits by considering the  
 127 maximum compression of fur. The closest the cylindrical hairs can pack together is in a hexagonal packing arrangement (9),  
 128 resulting in the lowest attainable porosity of

$$129 \quad \epsilon_{\text{min}} = 1 - \frac{\pi \sqrt{3}}{6} = 0.093. \quad [5]$$

130 We use this value of the minimum porosity to determine the minimum compressed height of fur, when all hairs lay parallel to  
 131 the skin.

132 **Wicking through porous fur.** We apply Darcy's model for wicking in porous media (10) to determine the volume and depth of  
 133 saliva wicked into the fur. The tongue is idealized as an infinite reservoir of fluid. In reality, the dorsal side of the tongue can  
 134 only hold a maximum of 0.12 mL of water, or 2.4 eyedropper drops, and therefore our analysis is only valid for volumes wicked  
 135 below this amount. When the tongue is contact with the fur, the depth to which saliva can penetrate may be written

$$136 \quad h_{\text{saliva}} = \left( \frac{4K\sigma \cos(\theta_h)}{\epsilon \mu R_p} \right)^{1/2} t^{1/2}, \quad [6]$$

137 where  $K$  is permeability,  $R_p$  is the mean pore radius of the fur,  $\theta_h$  is the contact angle of saliva on hair,  $\mu$  is the saliva viscosity,  
 138 and  $t$  is the time that the tongue remains in contact with the fur. We assume that saliva is flowing in the transverse direction  
 139 through an array of cylindrical hairs as shown in Figure 4B.

140 The mean pore radius across a bank of constant-radius fibers may be written (11):  $R_p = 2r_{\text{hair}} \frac{\epsilon}{1-\epsilon}$ . The permeability  
 141  $K$  of the porous media is determined using the Carman-Kozeny equation for transverse flow through cylindrical fibers (12):  
 142  $K = \frac{r_{\text{hair}}^2}{4k} \frac{\epsilon^3}{(1-\epsilon)^2}$ , where  $k$  is the Kozeny constant, equal to 10 for transverse flow. Fur is an example of a dynamic porous  
 143 media because the mean pore radius will change as fluid is introduced. This is due to the fact that hairs bend when surface  
 144 tension forces are applied. As analyzed by Py and Boudaoud (13), wet fibers aggregate into bundles, where the porosity of  
 145 these bundles is considered to be close-packed hexagonal packing. Therefore, hairs will form bundles when wetted [Figure  
 146 4A], decreasing porosity to its lowest attainable value [Figure 4B]. Thus, in our analysis, we use a wetted fur porosity of  
 147  $\epsilon = \epsilon_{\text{min}} = 0.093$ .

148 As shown by 6, the saliva can penetrate deeper the longer the tongue remains in contact with the fur. For grooming, the  
 149 contact time  $t \sim \frac{L_T}{v_{\text{groom}}}$  scales as the ratio of tongue length to grooming velocity  $v_{\text{groom}}$ . We substitute this contact time into 6  
 150 to estimate the depth the saliva has seeped. Saliva will fill the air pockets between hairs; therefore, the volume  $V_{\text{fluid}}$  of saliva  
 151 wicked into the fur is:

$$152 \quad V_{\text{fluid}} = \epsilon h_{\text{saliva}} W_T L_{\text{groom}}, \quad [7]$$

153 where  $L_{\text{groom}}$  is the lick length of the groom. By substituting  $h_{\text{saliva}}$  from 6 into 7, the volume of saliva may be written

$$154 \quad V_{\text{fluid}} = \left( \frac{\sigma \cos \theta_h}{\mu} \right)^{1/2} (r_{\text{hair}} L_T W_T^2)^{1/2} \left( \frac{L_{\text{groom}}^2}{v_{\text{groom}}} \right)^{1/2} \left( \frac{\epsilon^3}{20(1-\epsilon)} \right)^{1/2}. \quad [8]$$

155 8 consists of four types of inputs, including saliva properties, fur and tongue geometry, grooming kinematics, and fur porosity.  
 156 Values for these inputs are measured from experiments and reported in Tables S1-S4 of the Supplement. We use water as a  
 157 substitute for cat saliva, with the contact angle of water on hair of (14)  $\theta_h = 60^\circ$ , and  $\mu = 8.9 \times 10^{-4}$  Pa·s is the viscosity of  
 158 water.

159 In our model, we assume that saliva will act like water. In actuality, saliva is a non-Newtonian shear-thinning fluid, with  
 160 viscosity changing based on applied shear rate. We can show that this assumption is within reason by analyzing the shear rate  
 161 of fluid passing through the hairs. The shear rate  $\dot{\gamma}$  of fluid passing through a pore is a function of flow velocity and a length  
 162 scale:  $\dot{\gamma} = v_{\text{wick}}/R_p$ , where  $v_{\text{wick}} = h_{\text{saliva}}/t$  is the steady state wicking speed and  $R_p$  is the pore radius at minimum porosity.  
 163 We find  $\dot{\gamma} > 10^6 \text{ s}^{-1}$ ; therefore, assuming cat saliva has similar shear-thinning properties as human saliva (15), viscosity will be  
 164  $\mu_{\text{saliva}} \approx 10^{-3}$  Pa·s, on par with the viscosity of water  $\mu_{\text{water}} = 0.89 \times 10^{-3}$  Pa·s.

**Table S1. Grooming kinematics for 8 cats**

| Species                                  | N | Trials | $L_{\text{groom}}$ (mm) | $v_{\text{groom}}$ (mm/s) | Ref.                        |
|------------------------------------------|---|--------|-------------------------|---------------------------|-----------------------------|
| Cat ( <i>Felis catus</i> )               | 3 | 5      | 63 ± 20                 | 220 ± 9.3                 | Measured                    |
| Bobcat ( <i>Lynx rufus</i> )             | 3 | 8      | 38 ± 18                 | 150 ± 1.2                 | YouTube (Benji The Bobcat)  |
| Cougar ( <i>Puma concolor</i> )          | 1 | 1      | 120                     | 270                       | YouTube (Mexicrackah)       |
| Snow leopard ( <i>Panthera uncia</i> )   | 1 | 3      | 53 ± 27                 | 220 ± 19                  | YouTube (TheSacramentoZoo)  |
| Tiger ( <i>Panthera tigris</i> )         | 3 | 8      | 190 ± 36                | 270 ± 20                  | YouTube (IEAS, BigCatDerek) |
| Lion ( <i>Panthera leo</i> )             | 1 | 4      | 180 ± 57                | 260 ± 38                  | YouTube (Stoney Edwards)    |
| Leopard ( <i>Panthera pardus</i> )       | 1 | 5      | 79 ± 3                  | 240 ± 18                  | YouTube (Lock Head)         |
| Black Panther ( <i>Panthera pardus</i> ) | 1 | 2      | 74 ± 10                 | 270 ± 38                  | YouTube (Lock Head)         |

**Table S2. Tongue properties for 6 species of cat**

| Species                                | Sex               | Tongue samples | M (kg)       | $L_T$ (mm)  | $W_T$ (mm) |
|----------------------------------------|-------------------|----------------|--------------|-------------|------------|
| Cat ( <i>Felis catus</i> )             | F                 | 2              | 4            | 16.5 ± 3.5  | 13.0 ± 2.8 |
| Bobcat ( <i>Lynx rufus</i> )           | 2F, 1M, 1 unknown | 4              | 10.5 ± 1.6   | 23.5 ± 3.1  | 21.3 ± 1.7 |
| Cougar ( <i>Puma concolor</i> )        | F                 | 1              | 54           | 38.0        | 33.0       |
| Snow leopard ( <i>Panthera uncia</i> ) | M                 | 1              | 40           | 42.0        | 33.0       |
| Tiger ( <i>Panthera tigris</i> )       | F                 | 4              | 116.3 ± 25.6 | 64.0 ± 11.3 | 54.5 ± 4.4 |
| Lion ( <i>Panthera leo</i> )           | F                 | 1              | 135          | 71.0        | 60.0       |

**Table S3. Cavo papillae properties for 6 species of cat**

| Species                                | $h_{\text{papillae}}$ (mm) | $w_{\text{cavity}}$ (mm) | $V_{\text{cavity}}$ ( $\mu\text{L}$ ) |
|----------------------------------------|----------------------------|--------------------------|---------------------------------------|
| Cat ( <i>Felis catus</i> )             | 2.1                        | 0.30                     | 0.014                                 |
| Bobcat ( <i>Lynx rufus</i> )           | 2.3                        | 0.30                     | 0.009                                 |
| Cougar ( <i>Puma concolor</i> )        | 2                          | 0.30                     | 0.035                                 |
| Snow leopard ( <i>Panthera uncia</i> ) | 2.3                        | 0.17                     | 0.021                                 |
| Tiger ( <i>Panthera tigris</i> )       | 2.3                        | 0.22                     | 0.082                                 |
| Lion ( <i>Panthera leo</i> )           | 2.7                        | 0.50                     | 0.160                                 |

**Table S4. Down hair and fur properties for 19 cats**

| Species                                                 | M (kg) | $r_{\text{hair}}$ ( $\mu\text{m}$ ) | $\rho_{\text{fur}}$ (hairs/ $\text{mm}^2$ ) | $L_{\text{hair}}$ (mm) | Ref.          |
|---------------------------------------------------------|--------|-------------------------------------|---------------------------------------------|------------------------|---------------|
| Caucasian wildcat ( <i>Felis silvestris caucasica</i> ) | 5      | 9.5                                 | 80                                          | 35                     | Measured, (2) |
| Caracal ( <i>Caracal caracal</i> )                      | 11.8   | 9.6                                 | 25                                          | 30                     | Measured, (2) |
| Eurasian lynx ( <i>Lynx lynx</i> )                      | 18     | 9.3                                 | 90                                          | 35                     | Measured, (2) |
| Cheetah ( <i>Acinonyx jubatus</i> )                     | 40     | 14.5                                | 20                                          | 25                     | Measured, (2) |
| Snow leopard ( <i>Panthera uncia</i> )                  | 32     | 9.2                                 | 40                                          | 50                     | Measured, (2) |
| Leopard ( <i>Panthera pardus</i> )                      | 27     | 10.2                                | 30                                          | 30                     | Measured, (2) |
| Tiger ( <i>Panthera tigris</i> )                        | 130    | 15.0                                | 25                                          | 30                     | Measured, (2) |
| Bobcat ( <i>Lynx rufus</i> )                            | 8.6    | 7.9                                 | 90                                          | 31                     | Measured      |
| Cougar ( <i>Puma concolor</i> )                         | 54     | 8.9                                 | 80                                          | 35                     | Measured      |
| American short hair ( <i>Felis catus</i> )              | 4      | 11.0                                | 75                                          | 37                     | Measured, (3) |
| Siamese ( <i>Felis catus</i> )                          | 4      | 11.0                                | 75                                          | 28                     | (3)           |
| Egyptian Mau ( <i>Felis catus</i> )                     | 4      | 11.0                                | 75                                          | 31                     | (3)           |
| Oriental short hair ( <i>Felis catus</i> )              | 4      | 11.0                                | 75                                          | 35                     | (3)           |
| Himalayan (Persian) ( <i>Felis catus</i> )              | 4      | 11.0                                | 75                                          | 50                     | (3)           |
| Japanese cat (Native) ( <i>Felis catus</i> )            | 4      | 11.0                                | 75                                          | 58                     | (3)           |
| Persian ( <i>Felis catus</i> )                          | 4      | 11.0                                | 75                                          | 81                     | (3)           |
| Chincilla (Persian) ( <i>Felis catus</i> )              | 4      | 11.0                                | 75                                          | 88                     | (3)           |
| English rex ( <i>Felis catus</i> )                      | 4      | 8.1                                 | 75                                          | 20.4                   | (1)           |
| German rex ( <i>Felis catus</i> )                       | 4      | 8.5                                 | 75                                          | 20.6                   | (1)           |



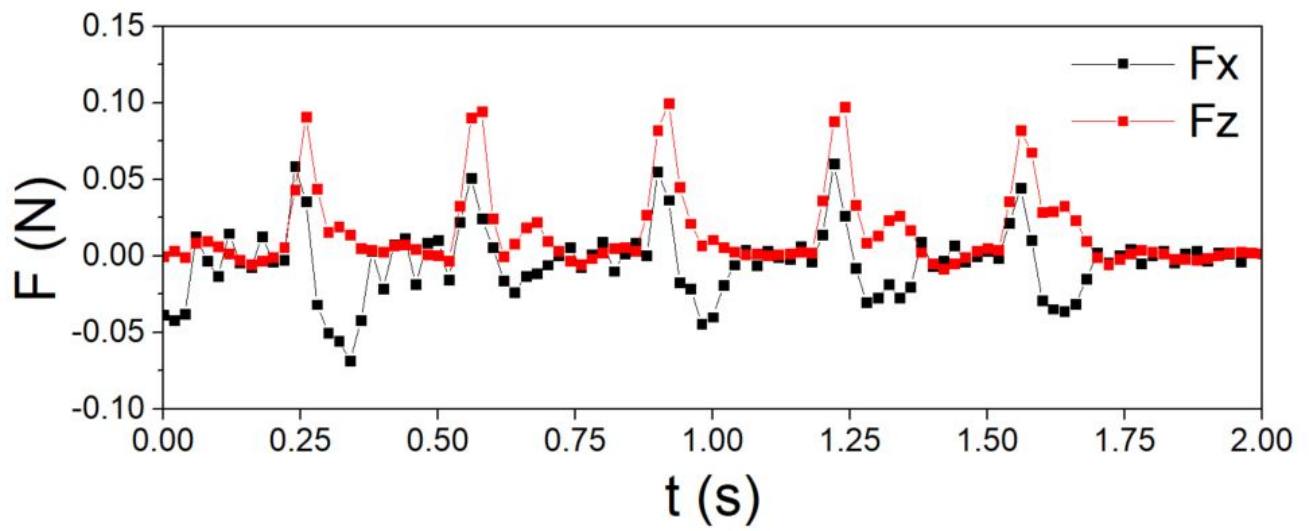

Fig. S1. Normal ( $F_z$ ) and parallel ( $F_x$ ) forces exerted by a domestic cat tongue during a grooming trial.

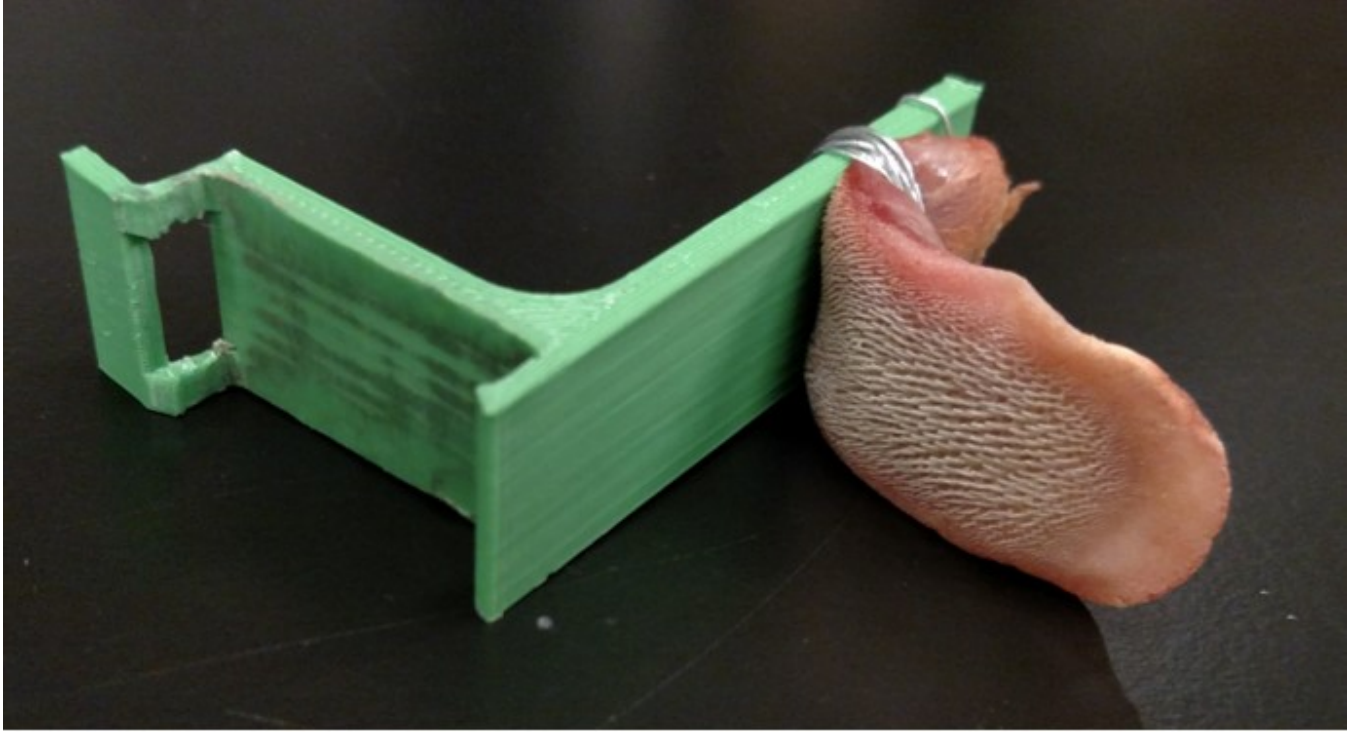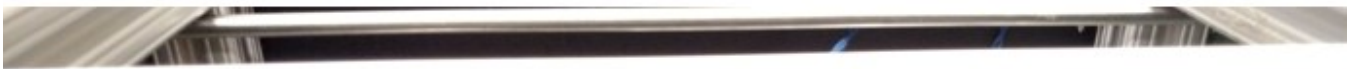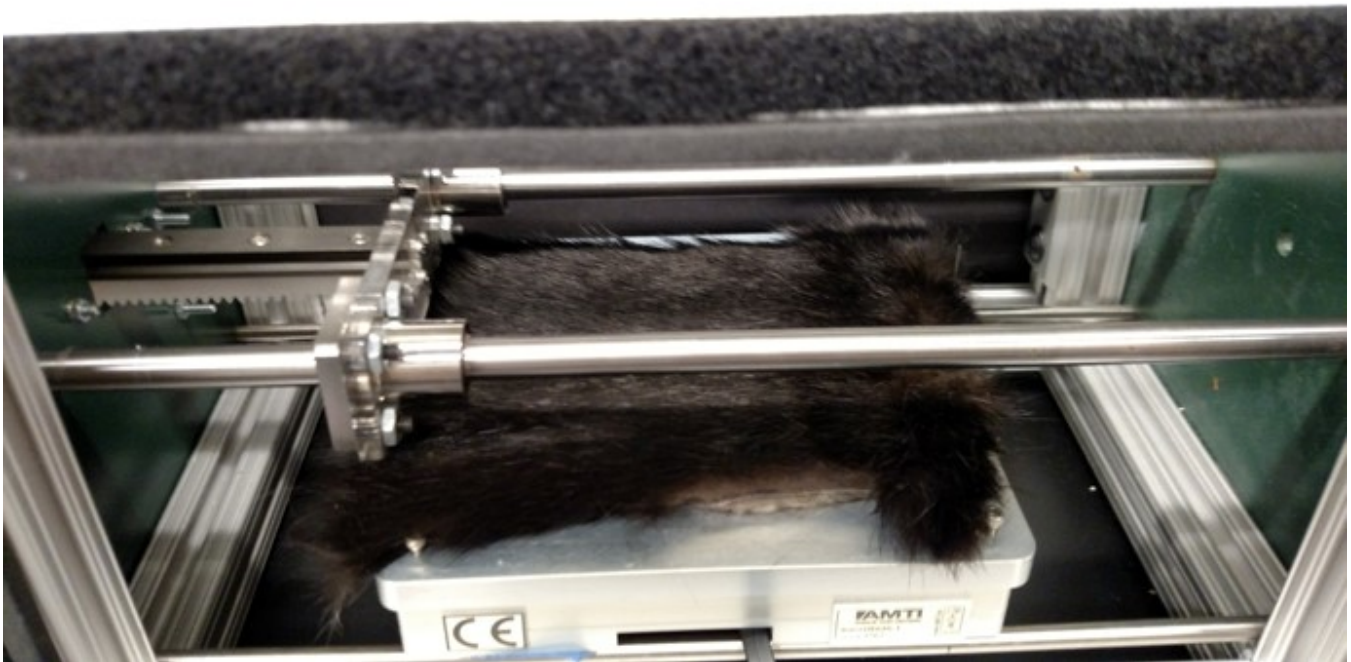

**Fig. S2.** Grooming machine. A cat tongue (top) is driven through a sample of cat fur (bottom) at a fixed velocity and fixed normal force of 0.1 N as measured by the AMTI HE6x6 force plate. The TIGR Brush and human hairbrush are also tested with the grooming machine.

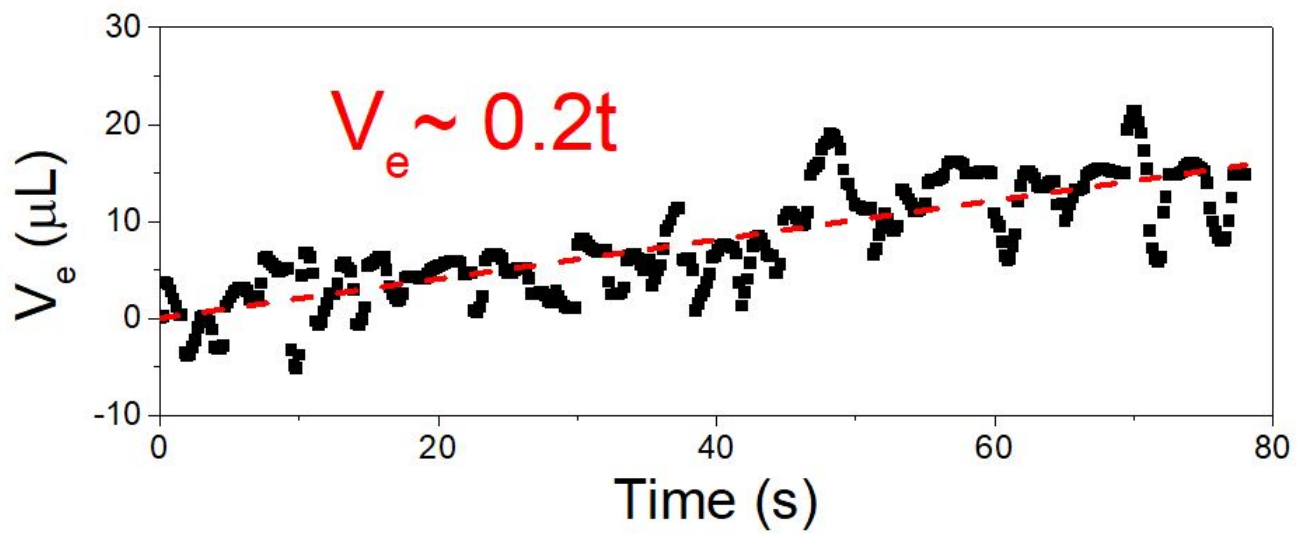

Fig. S3. Volume of water  $V_e$  evaporated from tongue surface over time; 6  $\mu\text{L}$  of water evaporates over 30 seconds.

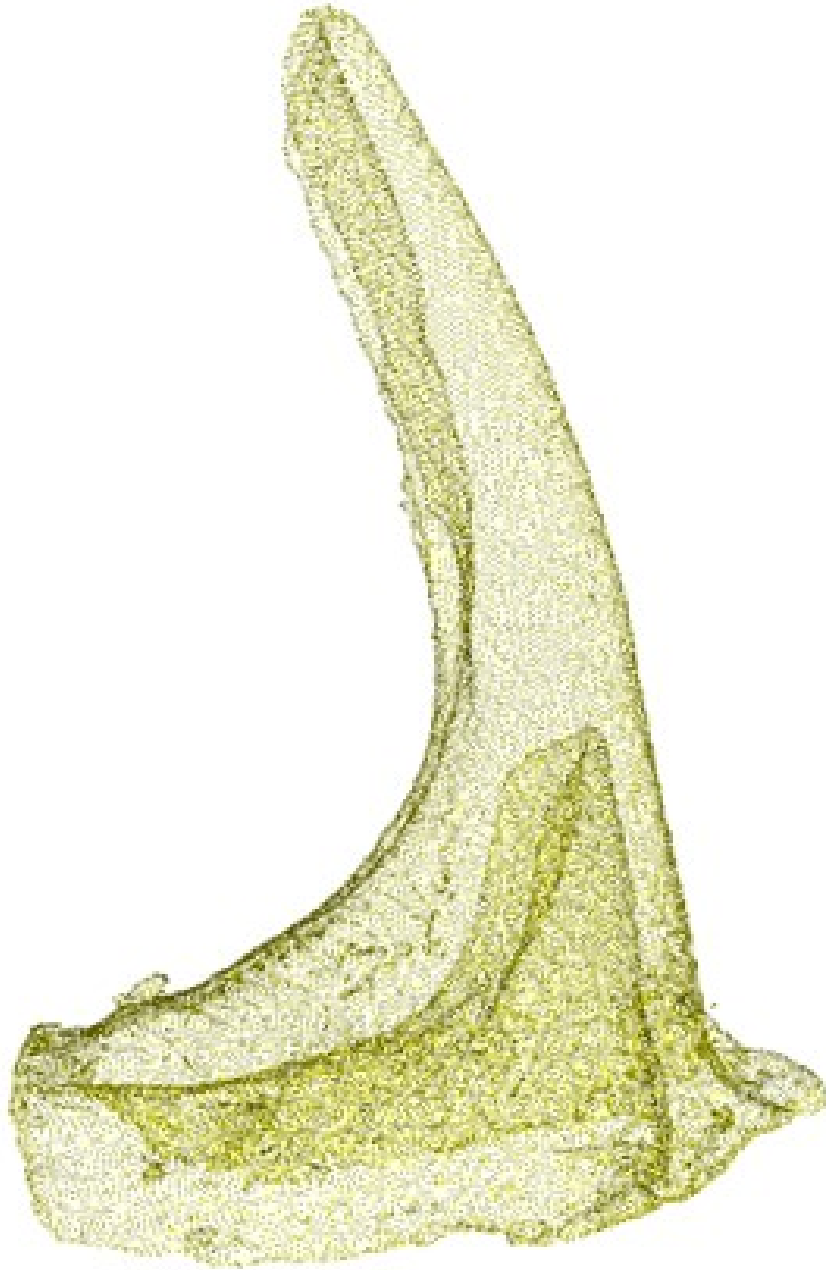

**Fig. S4.** A transparent model of a domestic cat's papilla, illustrating cavities present.

165 **Movie S1. Cavo papillae of a domestic cat rotating perpendicular to tongue during grooming filmed at 1000**  
166 **fps, slowed 25x.**

167 **Movie S2. Cat grooming videos, in order: cat, bobcat, cougar, snow leopard, tiger, lion, and leopard and black**  
168 **panther. Video credits in order: Alexis Noel, YouTube contributors Benji The Bobcat, 5831a, Mexicrackah,**  
169 **Stoney Edwards, Dougie Hamilton, and TheSacramentoZoo.**

170 **Movie S3. Tiger papilla wicking orange food dye. A precursor film can be seen advancing before the bulk**  
171 **fluid motion.**

172 **Movie S4. Easy hair removal from 3D-printed cat tongue mimic.**

## 173 **Additional acknowledgements**

174 For donating animal parts, we thank J. Mendelson at Zoo Atlanta, R. Nichols at Georgia Tech, Carter Taxidermy, E. Ramsay  
175 and the Pathology Service of the UT College of Veterinary Medicine, and Tiger Haven. We thank C. Hobbs for photography, A.  
176 Lin for  $\mu$ -CT scanning, The Museum of Comparative Zoology at Harvard Univ. for fur samples, T.-W. Tsai and K. Kabbabe  
177 for early contributions and A-C. Gagnon and G. Marignac at the National Veterinary School of Alfort in France advice.  
178 We thank YouTube contributors including Benji The Bobcat, 5831a, Mexicrackah, Stoney Edwards, Dougie Hamilton, and  
179 TheSacramentoZoo.

## 180 **References**

- 181 1. Searle A, Jude A (1956) The rex type of coat in the domestic cat. *Journal of Genetics* 54(3):506–512.
- 182 2. Kitchener AC, Van Valkenburgh B, Yamaguchi N (2010) Felid form and function. *Biology and conservation of wild felids*  
183 pp. 83–106.
- 184 3. Sato H, Matsuda H, Kubota S, Kawano K (2006) Statistical comparison of dog and cat guard hairs using numerical  
185 morphology. *Forensic science international* 158(2):94–103.
- 186 4. McKee CT, Last JA, Russell P, Murphy CJ (2011) Indentation versus tensile measurements of young's modulus for soft  
187 biological tissues. *Tissue Engineering Part B: Reviews* 17(3):155–164.
- 188 5. Engler AJ, Richert L, Wong JY, Picart C, Discher DE (2004) Surface probe measurements of the elasticity of sectioned  
189 tissue, thin gels and polyelectrolyte multilayer films: correlations between substrate stiffness and cell adhesion. *Surface*  
190 *Science* 570(1):142–154.
- 191 6. Farren L, Shayler S, Ennos A (2004) The fracture properties and mechanical design of human fingernails. *Journal of*  
192 *Experimental Biology* 207(5):735–741.
- 193 7. Washburn EW (1921) The dynamics of capillary flow. *Physical review* 17(3):273.
- 194 8. Bush JW, Hu DL (2006) Walking on water: biolocomotion at the interface. *Annu. Rev. Fluid Mech.* 38:339–369.
- 195 9. Chang HC, Wang LC (2010) A simple proof of thue's theorem on circle packing. *arXiv preprint arXiv:1009.4322*.
- 196 10. Masoodi R, Pillai KM, Varanasi PP (2007) Darcy's law-based models for liquid absorption in polymer wicks. *AICHE*  
197 *journal* 53(11):2769–2782.
- 198 11. Masoodi R, Pillai KM (2012) A general formula for capillary suction-pressure in porous media. *Journal of Porous Media*  
199 15(8).
- 200 12. Lekakou C, Bader M (1998) Mathematical modelling of macro-and micro-infiltration in resin transfer moulding (rtm).  
201 *Composites Part A: Applied Science and Manufacturing* 29(1-2):29–37.
- 202 13. Py C, Bastien R, Bico J, Roman B, Boudaoud A (2007) 3d aggregation of wet fibers. *EPL (Europhysics Letters)*  
203 77(4):44005.
- 204 14. Dickerson AK, Mills ZG, Hu DL (2012) Wet mammals shake at tuned frequencies to dry. *Journal of the Royal Society*  
205 *Interface* p. rsif20120429.
- 206 15. Helton KL, Yager P (2007) Interfacial instabilities affect microfluidic extraction of small molecules from non-newtonian  
207 fluids. *Lab on a Chip* 7(11):1581–1588.
